# Supplementary material for: Sub- and supercritical water conversion of organic-rich shale with low-maturity for oil and gas generation: using Chang 7 shale as an example
Source: Royal Society of Chemistry journal article supplement (doi:10.1039/d2se01361d), 2022-11-18
Supplement: d2se01361d1.pdf [file d2se01361d1.pdf]

## Supplementary Information

# Sub- and supercritical water conversion of organic-rich shale with low-maturity for oil and gas generation

Qiuyang Zhao <sup>a,\*</sup>, Yu Dong <sup>a</sup>, Lichen Zheng <sup>a</sup>, Tian Xie <sup>a</sup>, Baercheng Bawaa <sup>a</sup>, Hui Jin <sup>a,b</sup>, Liejin Guo <sup>a,\*</sup>

<sup>a</sup> State Key Laboratory of Multiphase Flow in Power Engineering, Xi'an Jiaotong University, Xi'an 710049, PR China

<sup>b</sup> Xinjin Weihua Institute of Clean Energy Research, Foshan 528216, PR China

✉\*Correspondence: qyzhao@mail.xjtu.edu.cn (Qiuyang Zhao); lj-guo@mail.xjtu.edu.cn (Liejin Guo).

### Contents

Table S1. Experiment conditions in Section 3.1.

Table S2. Quantitative analysis of oil products and residues as well as TOC conversion efficiency and mass balance in Section 3.1.

Table S3. Quantitative analysis of gas products in Section 3.1.

Fig. S1. Mass balance.

Table S4. Test of low temperature distillation of shale by aluminum retort in N<sub>2</sub> atmosphere.

Table S5. Pyrolysis of shale in N<sub>2</sub> atmosphere.

Table S6. Experiment conditions in Section 3.2.

Table S7. Quantitative analysis of oil products and residues in Section 3.2.

Table S8. Quantitative analysis of gas products and TOC conversion efficiency in Section 3.2.

**Note:**

Detailed experimental data in Section 3.1 are shown in the Table S1-S4.

**Table S1.** Experiment conditions in Section 3.1.

| Experiment Number | Reaction Temperature /°C | Reaction Pressure /MPa | Reaction Time /h | Particle Size Range / $\mu$ m | Water-shale Mass Ratio | Shale Mass /g | Water Mass /g |
|-------------------|--------------------------|------------------------|------------------|-------------------------------|------------------------|---------------|---------------|
| 1                 | 300                      | 25                     | 4                | 75-106                        | 1                      | 19.71         | 19.70         |
| 2                 | 300                      | 25                     | 4                | 75-106                        | 1                      | 19.68         | 19.72         |
| 3                 | 350                      | 25                     | 4                | 75-106                        | 1                      | 19.62         | 19.76         |
| 4                 | 350                      | 25                     | 4                | 75-106                        | 1                      | 19.62         | 19.74         |
| 5                 | 380                      | 25                     | 4                | 75-106                        | 1                      | 21.99         | 22.01         |
| 6                 | 380                      | 25                     | 4                | 75-106                        | 1                      | 22.01         | 22.03         |
| 7                 | 400                      | 25                     | 4                | 75-106                        | 1                      | 19.62         | 19.72         |
| 8                 | 400                      | 25                     | 4                | 75-106                        | 1                      | 19.62         | 19.66         |
| 9                 | 450                      | 25                     | 4                | 75-106                        | 1                      | 14.00         | 14.12         |
| 10                | 450                      | 25                     | 4                | 75-106                        | 1                      | 14.00         | 14.15         |
| 11                | 500                      | 25                     | 4                | 75-106                        | 1                      | 12.76         | 12.83         |
| 12                | 500                      | 25                     | 4                | 75-106                        | 1                      | 12.80         | 12.82         |
| 13                | 550                      | 25                     | 4                | 75-106                        | 1                      | 11.79         | 11.76         |
| 14                | 550                      | 25                     | 4                | 75-106                        | 1                      | 11.75         | 11.73         |
| 15                | 600                      | 25                     | 4                | 75-106                        | 1                      | 11.51         | 11.52         |
| 16                | 600                      | 25                     | 4                | 75-106                        | 1                      | 11.40         | 11.47         |
| 17                | 650                      | 25                     | 4                | 75-106                        | 1                      | 9.99          | 9.99          |
| 18                | 650                      | 25                     | 4                | 75-106                        | 1                      | 10.00         | 10.02         |

**Table S2.** Quantitative analysis of oil products and residues as well as TOC conversion efficiency and mass balance in Section 3.1.

| Experiment Number | Oil Yield per Gram of Shale /mg | Oil Yield per Gram of TOC <sup>a</sup> /mg | Mass Fraction of Carbon in Oil /% | Organic Carbon in Oil per Gram of TOC /mg | Saturates /% | Aromatics /% | Resins /% | Asphaltenes /% | Shale Residual Mass /g | H/C of Shale Residual | TOC Conversion Efficiency <sup>b</sup> | Mass Balance <sup>c</sup> |
|-------------------|---------------------------------|--------------------------------------------|-----------------------------------|-------------------------------------------|--------------|--------------|-----------|----------------|------------------------|-----------------------|----------------------------------------|---------------------------|
| 1                 | 15.05                           | 99.64                                      | 73.8%                             | 71.80                                     | 30.2%        | 38.3%        | 26.1%     | 5.4%           | 18.37                  | 2.18                  | 0.08                                   | 95%                       |
| 2                 | 14.34                           | 94.93                                      |                                   |                                           | 31.5%        | 36.7%        | 26.7%     | 5.1%           | 17.56                  |                       |                                        | 91%                       |
| 3                 | 34.85                           | 230.68                                     | 72.8%                             | 161.74                                    | 12.4%        | 29.8%        | 27.1%     | 30.7%          | 17.22                  | 1.72                  | 0.17                                   | 92%                       |
| 4                 | 32.25                           | 213.47                                     |                                   |                                           | 11.3%        | 30.6%        | 26.0%     | 32.1%          | 16.95                  |                       |                                        | 90%                       |
| 5                 | 52.27                           | 346.05                                     | 78.5%                             | 276.36                                    | 13.9%        | 36.2%        | 23.7%     | 26.3%          | 18.45                  | 1.64                  | 0.30                                   | 90%                       |
| 6                 | 54.07                           | 357.94                                     |                                   |                                           | 12.5%        | 38.2%        | 24.5%     | 24.8%          | 18.68                  |                       |                                        | 91%                       |
| 7                 | 27.19                           | 179.99                                     | 80.3%                             | 140.96                                    | 22.3%        | 44.5%        | 17.0%     | 16.1%          | 17.54                  | 1.62                  | 0.18                                   | 93%                       |
| 8                 | 25.87                           | 171.26                                     |                                   |                                           | 20.6%        | 43.5%        | 18.8%     | 17.1%          | 17.06                  |                       |                                        | 91%                       |
| 9                 | 14.99                           | 99.25                                      | 42.2%                             | 43.45                                     | 25.8%        | 39.7%        | 16.3%     | 18.2%          | 12.71                  | 1.53                  | 0.16                                   | 95%                       |
| 10                | 16.10                           | 106.60                                     |                                   |                                           | 24.2%        | 40.3%        | 15.6%     | 20.0%          | 12.44                  |                       |                                        | 93%                       |
| 11                | 13.04                           | 86.34                                      | 15.7%                             | 13.10                                     | 42.1%        | 35.3%        | 16.2%     | 6.3%           | 11.44                  | 1.23                  | 0.18                                   | 95%                       |
| 12                | 12.25                           | 81.12                                      |                                   |                                           | 44.4%        | 33.4%        | 15.6%     | 6.6%           | 11.51                  |                       |                                        | 95%                       |
| 13                | 8.96                            | 59.33                                      | 25.6%                             | 14.79                                     | 60.2%        | 26.8%        | 10.8%     | 2.2%           | 10.55                  | 1.15                  | 0.19                                   | 94%                       |
| 14                | 8.50                            | 56.30                                      |                                   |                                           | 58.2%        | 27.3%        | 11.6%     | 2.8%           | 9.93                   |                       |                                        | 90%                       |
| 15                | 0.00                            | 0.00                                       | - <sup>d</sup>                    | -                                         | -            | -            | -         | -              | 9.71                   | 1.03                  | 0.20                                   | 90%                       |
| 16                | 0.00                            | 0.00                                       | -                                 | -                                         | -            | -            | -         | -              | 9.85                   |                       |                                        | 91%                       |
| 17                | 0.00                            | 0.00                                       | -                                 | -                                         | -            | -            | -         | -              | 8.17                   | 0.88                  | 0.31                                   | 91%                       |
| 18                | 0.00                            | 0.00                                       | -                                 | -                                         | -            | -            | -         | -              | 8.19                   |                       |                                        | 91%                       |

<sup>a</sup>TOC is total organic carbon in oil shale.

<sup>b</sup>TOC Conversion Efficiency is the sum of organic carbon in oil and gas products over total organic carbon in oil shale.

$$= \frac{\text{sum of masses of products of gas, oil and shale residual}}{\text{mass of shale fed}}$$

<sup>c</sup>Mass balance

*mass of shale fed*

<sup>d</sup>- refers to no oil yield.

**Table S3.** Quantitative analysis of gas products in Section 3.1.

| Experiment Number | Gas Yield per Gram of Shale /ml | H <sub>2</sub> per Gram of Shale /mL | CO per Gram of Shale /mL | CH <sub>4</sub> per Gram of Shale /mL | CO <sub>2</sub> per Gram of Shale /mL | C <sub>2</sub> per Gram of Shale /mL | C <sub>3</sub> per Gram of Shale /mL | C <sub>4</sub> per Gram of Shale /mL | C <sub>5</sub> per Gram of Shale /mL | C <sub>6</sub> per Gram of Shale /mL | Organic Carbon in Gas per Gram of TOC <sup>a</sup> /mg | Gas Yield per Gram of Shale /mg |
|-------------------|---------------------------------|--------------------------------------|--------------------------|---------------------------------------|---------------------------------------|--------------------------------------|--------------------------------------|--------------------------------------|--------------------------------------|--------------------------------------|--------------------------------------------------------|---------------------------------|
| 1                 | 2.94                            | 0.31                                 | 0.00                     | 0.23                                  | 2.38                                  | 0.03                                 | 0.00                                 | 0.00                                 | 0.00                                 | 0.00                                 | 8.17                                                   | 4.46                            |
| 2                 | 2.77                            | 0.39                                 | 0.00                     | 0.17                                  | 2.16                                  | 0.03                                 | 0.00                                 | 0.00                                 | 0.00                                 | 0.00                                 |                                                        | 4.05                            |
| 3                 | 4.32                            | 0.77                                 | 0.00                     | 0.76                                  | 2.12                                  | 0.32                                 | 0.00                                 | 0.00                                 | 0.00                                 | 0.00                                 | 12.68                                                  | 4.73                            |
| 4                 | 4.62                            | 0.62                                 | 0.00                     | 0.96                                  | 2.70                                  | 0.35                                 | 0.00                                 | 0.00                                 | 0.00                                 | 0.00                                 |                                                        | 5.93                            |
| 5                 | 5.80                            | 1.15                                 | 0.00                     | 1.15                                  | 1.90                                  | 0.41                                 | 0.26                                 | 0.12                                 | 0.03                                 | 0.00                                 | 19.84                                                  | 5.58                            |
| 6                 | 6.21                            | 1.30                                 | 0.00                     | 1.20                                  | 2.50                                  | 0.59                                 | 0.36                                 | 0.20                                 | 0.05                                 | 0.00                                 |                                                        | 7.34                            |
| 7                 | 9.04                            | 2.18                                 | 0.00                     | 2.23                                  | 2.23                                  | 0.89                                 | 0.67                                 | 0.38                                 | 0.11                                 | 0.01                                 | 36.52                                                  | 9.15                            |
| 8                 | 9.76                            | 2.05                                 | 0.00                     | 2.44                                  | 2.90                                  | 1.03                                 | 0.73                                 | 0.45                                 | 0.15                                 | 0.02                                 |                                                        | 11.06                           |
| 9                 | 25.45                           | 4.55                                 | 0.00                     | 8.97                                  | 4.07                                  | 3.91                                 | 2.90                                 | 1.91                                 | 0.24                                 | 0.01                                 | 115.61                                                 | 28.65                           |
| 10                | 23.59                           | 4.35                                 | 0.00                     | 7.91                                  | 3.47                                  | 3.84                                 | 2.41                                 | 1.17                                 | 0.44                                 | 0.01                                 |                                                        | 24.74                           |
| 11                | 40.13                           | 5.19                                 | 0.00                     | 19.43                                 | 4.92                                  | 6.78                                 | 3.09                                 | 0.38                                 | 0.03                                 | 0.01                                 | 168.64                                                 | 36.66                           |
| 12                | 42.89                           | 4.90                                 | 0.00                     | 20.58                                 | 5.41                                  | 7.38                                 | 3.79                                 | 0.78                                 | 0.05                                 | 0.02                                 |                                                        | 41.24                           |
| 13                | 52.66                           | 8.77                                 | 0.01                     | 30.87                                 | 6.01                                  | 6.89                                 | 0.09                                 | 0.07                                 | 0.03                                 | 0.01                                 | 171.18                                                 | 40.36                           |
| 14                | 54.72                           | 8.30                                 | 0.02                     | 31.88                                 | 6.77                                  | 7.49                                 | 0.13                                 | 0.09                                 | 0.05                                 | 0.01                                 |                                                        | 43.25                           |
| 15                | 75.63                           | 15.81                                | 0.11                     | 48.25                                 | 9.03                                  | 2.38                                 | 0.00                                 | 0.00                                 | 0.00                                 | 0.00                                 | 197.87                                                 | 51.80                           |
| 16                | 74.16                           | 15.94                                | 0.09                     | 46.53                                 | 9.33                                  | 2.28                                 | 0.00                                 | 0.00                                 | 0.00                                 | 0.00                                 |                                                        | 51.08                           |
| 17                | 130.47                          | 34.34                                | 0.62                     | 73.93                                 | 21.28                                 | 0.42                                 | 0.00                                 | 0.00                                 | 0.00                                 | 0.00                                 | 307.78                                                 | 90.09                           |
| 18                | 126.93                          | 33.19                                | 0.47                     | 72.86                                 | 20.06                                 | 0.34                                 | 0.00                                 | 0.00                                 | 0.00                                 | 0.00                                 |                                                        | 86.87                           |

<sup>a</sup>TOC is total organic carbon in oil shale.

Fig. S1. Mass balance.

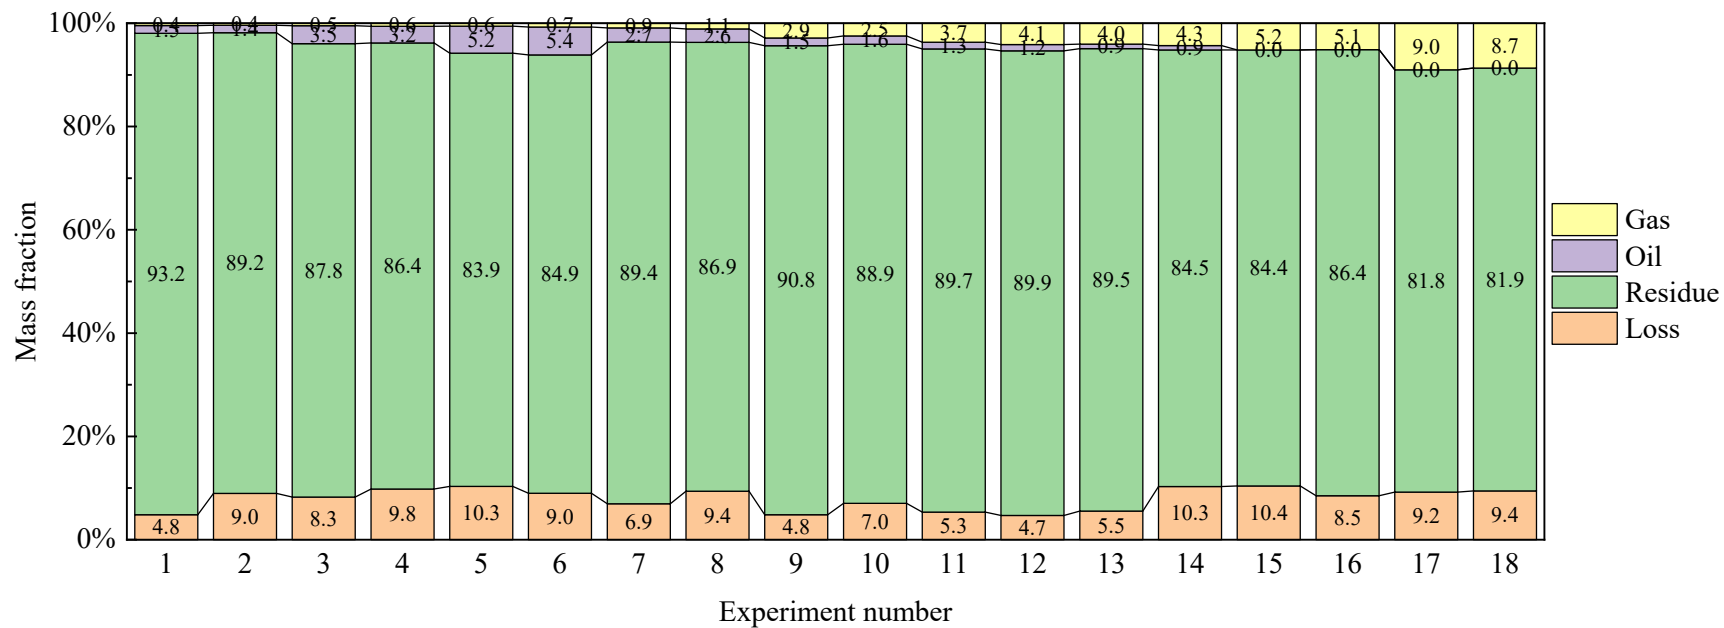

The mass loss could come from the evaporating of low boiling point hydrocarbons, solid residue loss during collecting and small amounts of organics dissolved in water.

**Table S4.** Test of low temperature distillation of shale by aluminum retort in N<sub>2</sub> atmosphere.

| Experiment Number | Reaction Temperature /°C | Heating Rate °C/min | Duration at End Point of Heating /h | Reaction Pressure /atm | Atmosphere     | Particle Size Range /µm | Shale Mass /g | Oil Yield per Gram of Shale /mg | Oil Yield per Gram of TOC <sup>a</sup> /mg | Average Oil Yield per Gram of TOC /mg |
|-------------------|--------------------------|---------------------|-------------------------------------|------------------------|----------------|-------------------------|---------------|---------------------------------|--------------------------------------------|---------------------------------------|
| 19                | 25-380                   | 6                   | 4                                   | 1                      | N <sub>2</sub> | 75-106                  | 29.99         | 25.13                           | 166.36                                     | 171.46                                |
| 20                | 25-380                   | 6                   | 4                                   | 1                      | N <sub>2</sub> | 75-106                  | 30.04         | 26.67                           | 176.55                                     |                                       |
| 21                | 25-520                   | 6                   | 0.3                                 | 1                      | N <sub>2</sub> | 75-106                  | 29.99         | 52.03                           | 344.44                                     | 346.89                                |
| 22                | 25-520                   | 6                   | 0.3                                 | 1                      | N <sub>2</sub> | 75-106                  | 30.01         | 52.77                           | 349.34                                     |                                       |

<sup>a</sup>TOC is total organic carbon in oil shale.

**Table S5.** Pyrolysis of shale in N<sub>2</sub> atmosphere.

| Experiment Number | Reaction Temperature /°C | Reaction Pressure /MPa | Reaction Time /h | Particle Size Range /µm | Shale Mass /g | Oil Yield per Gram of Shale /mg | Oil Yield per Gram of TOC <sup>a</sup> /mg | Saturates /% | Aromatics /% | Resins /% | Asphaltenes /% |
|-------------------|--------------------------|------------------------|------------------|-------------------------|---------------|---------------------------------|--------------------------------------------|--------------|--------------|-----------|----------------|
| 23                | 350                      | 25                     | 4                | 75-106                  | 19.65         | 11.47                           | 75.93                                      | 28.34        | 39.13        | 24.36     | 8.17           |
| 24                | 350                      | 25                     | 4                | 75-106                  | 19.64         | 13.54                           | 89.63                                      | 28.51        | 40.22        | 23.75     | 7.52           |
| 25                | 380                      | 25                     | 4                | 75-106                  | 22.00         | 23.04                           | 152.50                                     | 17.03        | 46.30        | 17.28     | 19.39          |
| 26                | 380                      | 25                     | 4                | 75-106                  | 22.01         | 24.26                           | 160.60                                     | 16.77        | 44.76        | 18.44     | 20.03          |
| 27                | 400                      | 25                     | 4                | 75-106                  | 19.60         | 26.36                           | 174.50                                     | 20.39        | 35.64        | 18.16     | 25.81          |
| 28                | 400                      | 25                     | 4                | 75-106                  | 19.59         | 25.76                           | 170.53                                     | 19.84        | 36.71        | 16.78     | 26.67          |
| 29                | 450                      | 25                     | 4                | 75-106                  | 14.00         | 14.49                           | 95.92                                      | 23.93        | 46.03        | 13.58     | 16.46          |
| 30                | 450                      | 25                     | 4                | 75-106                  | 14.02         | 13.86                           | 91.75                                      | 24.13        | 47.56        | 13.22     | 15.09          |

<sup>a</sup>TOC is total organic carbon in oil shale.

**Note:**

Detailed experimental data in Section 3.2 are shown in the Table S6-S8.

**Table S6.** Experiment conditions in Section 3.2.

| Experiment Number                | Reaction Temperature /°C | Reaction Pressure /MPa | Reaction Time /h | Particle Size Range / $\mu\text{m}$ | Water-TOC <sup>a</sup> Mass Ratio | Shale Mass /g | Water Mass /g | Mass Fraction of Carbon in Shale /% |
|----------------------------------|--------------------------|------------------------|------------------|-------------------------------------|-----------------------------------|---------------|---------------|-------------------------------------|
| Pretreated Shale <sup>b</sup> -1 | 380                      | 25                     | 4                | 75-106                              | 6.5:1                             | 24.20         | 21.98         | 12.7%                               |
| Pretreated Shale-2               | 380                      | 25                     | 4                | 75-106                              | 6.5:1                             | 24.21         | 22.03         |                                     |
| HCl-R-3                          | 380                      | 25                     | 4                | 75-106                              | 6.5:1                             | 21.52         | 21.96         | 15.2%                               |
| HCl-R-4                          | 380                      | 25                     | 4                | 75-106                              | 6.5:1                             | 21.51         | 22.03         |                                     |
| HF/HCl-R-5                       | 380                      | 25                     | 4                | 75-106                              | 6.5:1                             | 5.81          | 21.95         | 56.3%                               |
| HF/HCl-R-6                       | 380                      | 25                     | 4                | 75-106                              | 6.5:1                             | 5.77          | 22.05         |                                     |
| HNO <sub>3</sub> -R-7            | 380                      | 25                     | 4                | 75-106                              | 6.5:1                             | 4.70          | 21.96         | 69.5%                               |
| HNO <sub>3</sub> -R-8            | 380                      | 25                     | 4                | 75-106                              | 6.5:1                             | 4.74          | 21.85         |                                     |
| Pretreated Shale-9               | 650                      | 25                     | 4                | 75-106                              | 6.5:1                             | 11.05         | 10.06         | 12.7%                               |
| Pretreated Shale-10              | 650                      | 25                     | 4                | 75-106                              | 6.5:1                             | 11.11         | 10.12         |                                     |
| HCl-R-11                         | 650                      | 25                     | 4                | 75-106                              | 6.5:1                             | 9.85          | 10.12         | 15.2%                               |
| HCl-R-12                         | 650                      | 25                     | 4                | 75-106                              | 6.5:1                             | 9.80          | 10.04         |                                     |
| HF/HCl-R-13                      | 650                      | 25                     | 4                | 75-106                              | 6.5:1                             | 2.65          | 10.07         | 56.3%                               |
| HF/HCl-R-14                      | 650                      | 25                     | 4                | 75-106                              | 6.5:1                             | 2.75          | 10.32         |                                     |
| HNO <sub>3</sub> -R-15           | 650                      | 25                     | 4                | 75-106                              | 6.5:1                             | 2.22          | 10.32         | 69.5%                               |
| HNO <sub>3</sub> -R-16           | 650                      | 25                     | 4                | 75-106                              | 6.5:1                             | 2.20          | 10.07         |                                     |

<sup>a</sup>TOC is total organic carbon in oil shale.

<sup>b</sup>Pretreated Shale refers to the shale undergone Soxhlet extraction with carbon disulfide.

**Table S7.** Quantitative analysis of oil products and residues in Section 3.2.

| Experiment Number                | Oil Yield per Gram of Shale /mg | Oil Yield per Gram of TOC <sup>a</sup> /mg | Mass Fraction of Carbon in Oil /% | Organic Carbon in Oil per Gram of TOC /mg | Saturates /% | Aromatics /% | Resins /% | Asphaltenes /% | Shale Residual Mass /g |
|----------------------------------|---------------------------------|--------------------------------------------|-----------------------------------|-------------------------------------------|--------------|--------------|-----------|----------------|------------------------|
| Pretreated Shale <sup>b</sup> -1 | 32.56                           | 256.78                                     | 78.6%                             | 200.42                                    | 11.7%        | 30.8%        | 30.6%     | 26.9%          | 32.56                  |
| Pretreated Shale-2               | 32.11                           | 253.21                                     |                                   |                                           | 12.9%        | 32.2%        | 28.9%     | 26.0%          | 32.11                  |
| HCl-R-3                          | 31.23                           | 205.61                                     | 77.5%                             | 156.70                                    | 15.2%        | 42.6%        | 25.6%     | 16.5%          | 31.23                  |
| HCl-R-4                          | 30.19                           | 198.77                                     |                                   |                                           | 13.1%        | 41.3%        | 27.6%     | 17.9%          | 30.19                  |
| HF/HCl-R-5                       | 133.05                          | 236.48                                     | 78.1%                             | 184.22                                    | 10.6%        | 38.9%        | 29.0%     | 21.5%          | 133.05                 |
| HF/HCl-R-6                       | 132.36                          | 235.27                                     |                                   |                                           | 11.9%        | 39.5%        | 27.8%     | 20.8%          | 132.36                 |
| HNO <sub>3</sub> -R-7            | 130.66                          | 188.14                                     | 76.3%                             | 145.02                                    | 11.9%        | 31.7%        | 32.3%     | 24.2%          | 130.66                 |
| HNO <sub>3</sub> -R-8            | 133.34                          | 192.00                                     |                                   |                                           | 12.0%        | 33.5%        | 31.5%     | 23.0%          | 133.34                 |
| Pretreated Shale-9               | 0.00                            | 0.00                                       | - <sup>c</sup>                    | -                                         | -            | -            | -         | -              | 0.00                   |
| Pretreated Shale-10              | 0.00                            | 0.00                                       | -                                 | -                                         | -            | -            | -         | -              | 0.00                   |
| HCl-R-11                         | 0.00                            | 0.00                                       | -                                 | -                                         | -            | -            | -         | -              | 0.00                   |
| HCl-R-12                         | 0.00                            | 0.00                                       | -                                 | -                                         | -            | -            | -         | -              | 0.00                   |
| HF/HCl-R-13                      | 0.00                            | 0.00                                       | -                                 | -                                         | -            | -            | -         | -              | 0.00                   |
| HF/HCl-R-14                      | 0.00                            | 0.00                                       | -                                 | -                                         | -            | -            | -         | -              | 0.00                   |
| HNO <sub>3</sub> -R-15           | 0.00                            | 0.00                                       | -                                 | -                                         | -            | -            | -         | -              | 0.00                   |
| HNO <sub>3</sub> -R-16           | 0.00                            | 0.00                                       | -                                 | -                                         | -            | -            | -         | -              | 0.00                   |

<sup>a</sup>TOC is total organic carbon in oil shale.

<sup>b</sup>Pretreated Shale refers to the shale undergone Soxhlet extraction with carbon disulfide.

<sup>c</sup>- refers to no oil yielded.



**Table S8.** Quantitative analysis of gas products and TOC conversion efficiency in Section 3.2.

| Experiment Number                | Gas Yield per Gram of TOC <sup>a</sup> /ml | H <sub>2</sub> per Gram of TOC /mL | CO per Gram of TOC /mL | CH <sub>4</sub> per Gram of TOC /mL | CO <sub>2</sub> per Gram of TOC /mL | C <sub>2</sub> per Gram of TOC /mL | C <sub>3</sub> per Gram of TOC /mL | C <sub>4</sub> per Gram of TOC /mL | C <sub>5</sub> per Gram of TOC /mL | C <sub>6</sub> per Gram of TOC /mL | Organic Carbon in Gas per Gram of TOC /mg | TOC Conversion Efficiency <sup>b</sup> |
|----------------------------------|--------------------------------------------|------------------------------------|------------------------|-------------------------------------|-------------------------------------|------------------------------------|------------------------------------|------------------------------------|------------------------------------|------------------------------------|-------------------------------------------|----------------------------------------|
| Pretreated Shale <sup>c</sup> -1 | 35.46                                      | 8.62                               | 0.00                   | 8.02                                | 11.70                               | 3.35                               | 2.41                               | 1.15                               | 0.21                               | 0.01                               | 0.02                                      | 0.22                                   |
| Pretreated Shale-2               | 34.37                                      | 8.87                               | 0.00                   | 8.30                                | 11.04                               | 3.12                               | 1.87                               | 0.95                               | 0.21                               | 0.01                               |                                           |                                        |
| HCl-R-3                          | 36.56                                      | 12.76                              | 0.00                   | 9.60                                | 6.15                                | 4.07                               | 2.59                               | 1.08                               | 0.31                               | 0.00                               | 0.02                                      | 0.18                                   |
| HCl-R-4                          | 37.95                                      | 11.41                              | 0.00                   | 10.42                               | 7.35                                | 4.14                               | 2.65                               | 1.60                               | 0.40                               | 0.00                               |                                           |                                        |
| HF/HCl-R-5                       | 23.38                                      | 7.55                               | 0.02                   | 6.37                                | 5.42                                | 2.76                               | 0.89                               | 0.33                               | 0.04                               | 0.00                               | 0.01                                      | 0.20                                   |
| HF/HCl-R-6                       | 21.67                                      | 7.39                               | 0.02                   | 6.18                                | 4.49                                | 2.39                               | 0.84                               | 0.31                               | 0.05                               | 0.00                               |                                           |                                        |
| HNO <sub>3</sub> -R-7            | 35.36                                      | 4.43                               | 0.34                   | 6.83                                | 18.32                               | 2.10                               | 2.14                               | 0.96                               | 0.22                               | 0.01                               | 0.02                                      | 0.17                                   |
| HNO <sub>3</sub> -R-8            | 31.91                                      | 3.64                               | 0.30                   | 5.97                                | 16.40                               | 3.00                               | 1.51                               | 0.88                               | 0.20                               | 0.01                               |                                           |                                        |
| Pretreated Shale-9               | 742.63                                     | 224.87                             | 4.46                   | 383.88                              | 127.83                              | 1.58                               | 0.00                               | 0.00                               | 0.00                               | 0.00                               | 0.25                                      | 0.25                                   |
| Pretreated Shale-10              | 751.52                                     | 227.82                             | 3.26                   | 387.88                              | 130.93                              | 1.62                               | 0.00                               | 0.00                               | 0.00                               | 0.00                               |                                           |                                        |
| HCl-R-11                         | 821.57                                     | 257.43                             | 6.18                   | 403.94                              | 152.78                              | 1.24                               | 0.00                               | 0.00                               | 0.00                               | 0.00                               | 0.28                                      | 0.28                                   |
| HCl-R-12                         | 833.15                                     | 259.42                             | 6.93                   | 409.85                              | 155.40                              | 1.54                               | 0.00                               | 0.00                               | 0.00                               | 0.00                               |                                           |                                        |
| HF/HCl-R-13                      | 779.63                                     | 203.33                             | 5.67                   | 389.19                              | 179.87                              | 1.57                               | 0.00                               | 0.00                               | 0.00                               | 0.00                               | 0.28                                      | 0.28                                   |
| HF/HCl-R-14                      | 768.30                                     | 200.82                             | 4.33                   | 385.25                              | 176.30                              | 1.60                               | 0.00                               | 0.00                               | 0.00                               | 0.00                               |                                           |                                        |
| HNO <sub>3</sub> -R-15           | 713.38                                     | 184.93                             | 6.13                   | 356.88                              | 163.70                              | 1.75                               | 0.00                               | 0.00                               | 0.00                               | 0.00                               | 0.26                                      | 0.26                                   |
| HNO <sub>3</sub> -R-16           | 703.69                                     | 180.97                             | 6.93                   | 352.69                              | 161.68                              | 1.42                               | 0.00                               | 0.00                               | 0.00                               | 0.00                               |                                           |                                        |

<sup>a</sup>TOC is total organic carbon in oil shale.

<sup>b</sup>TOC Conversion Efficiency is the sum of organic carbon in oil and gas products over total organic carbon in oil shale.

<sup>c</sup>Pretreated Shale refers to the shale undergone Soxhlet extraction with carbon disulfide.
